# Supplementary material
Source: MDPI journal article supplement (https://www.mdpi.com/2077-0472/11/5/413)
Supplement: s1 [file s1]

**Table S1.** Development of soybean cultivars (mean  $\pm$  SD for 2016-2019) – Wrocław 51°10' N, 17°06' E (south-western Poland).

| Growing stage<br>in scale BBCH | Sowing date                    |           |           |           |            |            |
|--------------------------------|--------------------------------|-----------|-----------|-----------|------------|------------|
|                                | I                              |           | II        |           | III        |            |
|                                | Cultivars                      |           |           |           |            |            |
|                                | Lissabon                       | Merlin    | Lissabon  | Merlin    | Lissabon   | Merlin     |
|                                | Number of days from sowing to: |           |           |           |            |            |
| Emergence 10                   | 21 ± 8.5                       | 20 ± 7.8  | 15 ± 7.3  | 15 ± 6.3  | 15 ± 2.5   | 15 ± 2.1   |
| Flower buds on main stem 51    | 52 ± 5.3                       | 52 ± 7.4  | 45 ± 4.9  | 44 ± 4.6  | 40 ± 4.1   | 39 ± 4.1   |
| Beginning of flowering 61      | 56 ± 5.7                       | 55 ± 5.3  | 49 ± 4.1  | 48 ± 2.5  | 45 ± 3.1   | 43 ± 3.4   |
| End of flowering 69            | 82 ± 10.6                      | 81 ± 10.4 | 75 ± 11.2 | 73 ± 10.7 | 71 ± 11.6  | 67 ± 10.5  |
| Maturity 89                    | 139 ± 8.6                      | 137 ± 8.9 | 130 ± 6.3 | 129 ± 6.8 | 126 ± 10.6 | 123 ± 10.0 |

Sowing dates: I – the earliest (16-21.04), II – delayed 10 days in relation to the earliest date (26.04-10.05), III – delayed 20 days in relation to the earliest (06-19.05)

**Table S2.** Soybean seed yield [Mg ha<sup>-1</sup>] – Wrocław 51°10' N, 17°06' E (south-western Poland).

| Specification | N  | Mean  | SD    | SE    |
|---------------|----|-------|-------|-------|
| Total mean    | 96 | 2.68  | 0.490 | 0.050 |
| Year          |    |       |       |       |
| 2016          | 24 | 3.30a | 0.342 | 0.070 |
| 2017          | 24 | 2.18d | 0.313 | 0.064 |
| 2018          | 24 | 2.47c | 0.162 | 0.033 |
| 2019          | 24 | 2.76b | 0.177 | 0.036 |
| Sowing dates  |    |       |       |       |
| I             | 32 | 2.79a | 0.529 | 0.094 |
| II            | 32 | 2.74a | 0.500 | 0.088 |
| III           | 32 | 2.50b | 0.394 | 0.070 |
| Cultivars     |    |       |       |       |
| Lissabon      | 48 | 2.73a | 0.427 | 0.062 |
| Merlin        | 48 | 2.63b | 0.545 | 0.079 |

Sowing dates: I – the earliest (16-21.04), II – delayed 10 days in relation to the earliest date (26.04-10.05), III – delayed 20 days in relation to the earliest (06-19.05).

N – sample size; SD – standard deviation; SE – standard error.

Different letters indicate a significant difference (Tukey's multiple range test).

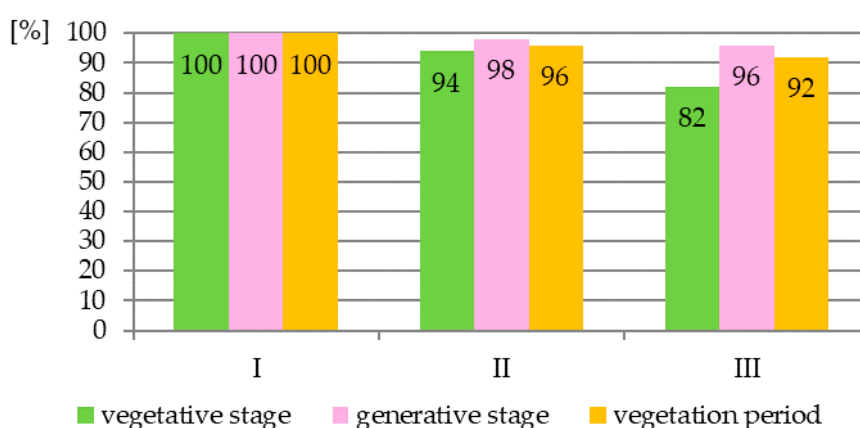

**Figure S1.** Relation between sowing date and the sum of day length during soybean development in reference to the 1<sup>st</sup> sowing date (Sowing dates: I – the earliest, II – delayed 10 days in relation to the earliest date, III – delayed 20 days in relation to the earliest). The values shown in the figure can be described by the equation:  $\%A_i = (A_i \cdot 100) / A_i$ ; where A = sum of day length measured in hours during soybean development from sowing date and “i” is the period of the development stage corresponding to sowing dates I, II, III.

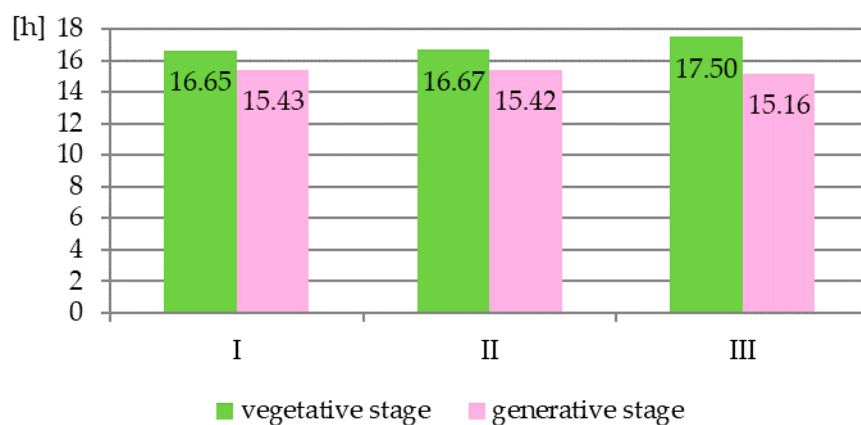

**Figure S2.** Effect of sowing date on mean day length [h] during vegetative and generative development of soybean (Sowing dates: I – the earliest, II – delayed 10 days in relation to the earliest date, III – delayed 20 days in relation to the earliest).

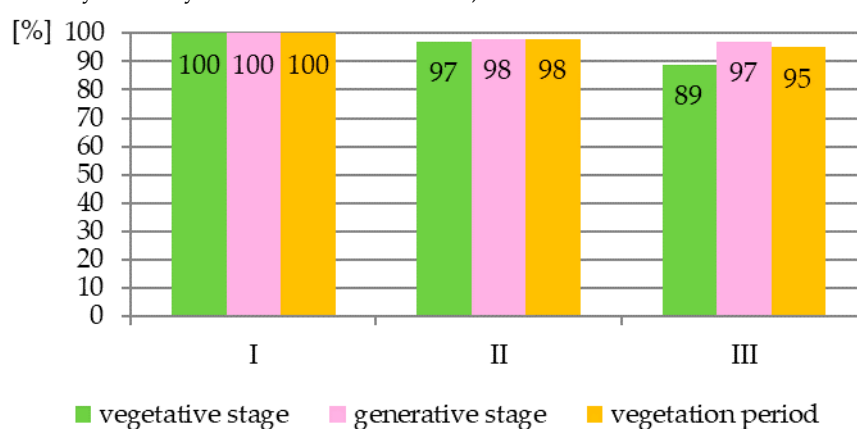

**Figure S3.** Relation between sowing date and the sum of mean daily temperatures during soybean development in reference to the 1<sup>st</sup> sowing date (Sowing dates: I – the earliest, II – delayed 10 days in relation to the earliest date, III – delayed 20 days in relation to the earliest). The values shown in the figure can be described by the equation:  $\%B_i = (B_i \cdot 100) / B_i$ , where B = sum of mean daily temperatures (°C) during soybean development from sowing date and “i” is the period of the development stage corresponding to sowing dates I, II, III.

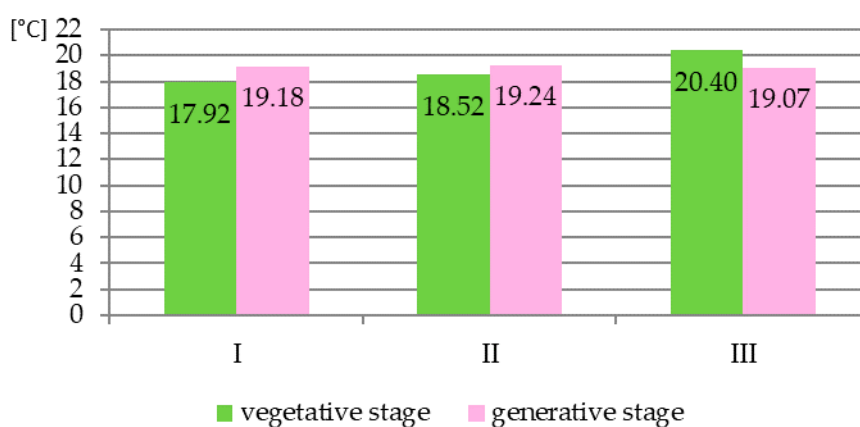

**Figure S4.** Effect of sowing date on mean daily temperature [°C] during vegetative and generative development of soybean (Sowing dates: I – the earliest, II – delayed 10 days in relation to the earliest date, III – delayed 20 days in relation to the earliest).

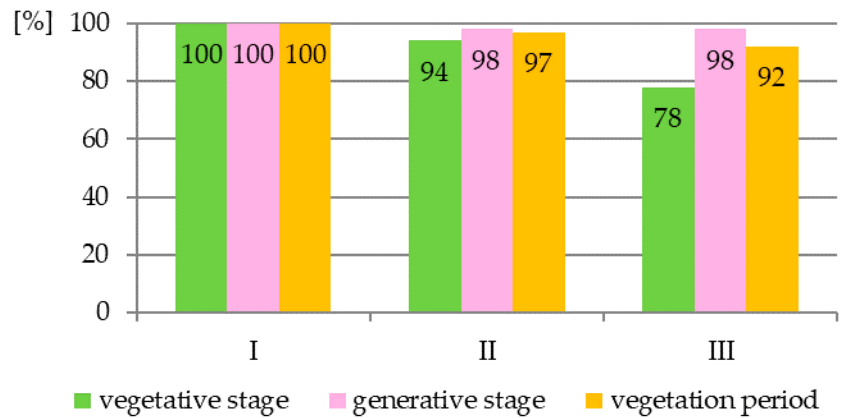

**Figure S5.** Sowing date and the relative length of development periods from emergence in reference to their length at the 1<sup>st</sup> sowing date (Sowing dates: I – the earliest, II – delayed 10 days in relation to the earliest date, III – delayed 20 days in relation to the earliest). The values shown in the figure can be described by the equation:  $\%C_i = (C_i * 100) / C_1$ ; where  $C_i$  = number of days during soybean development from emergence date and “i” is the period of the development stage corresponding to sowing dates I, II, III.

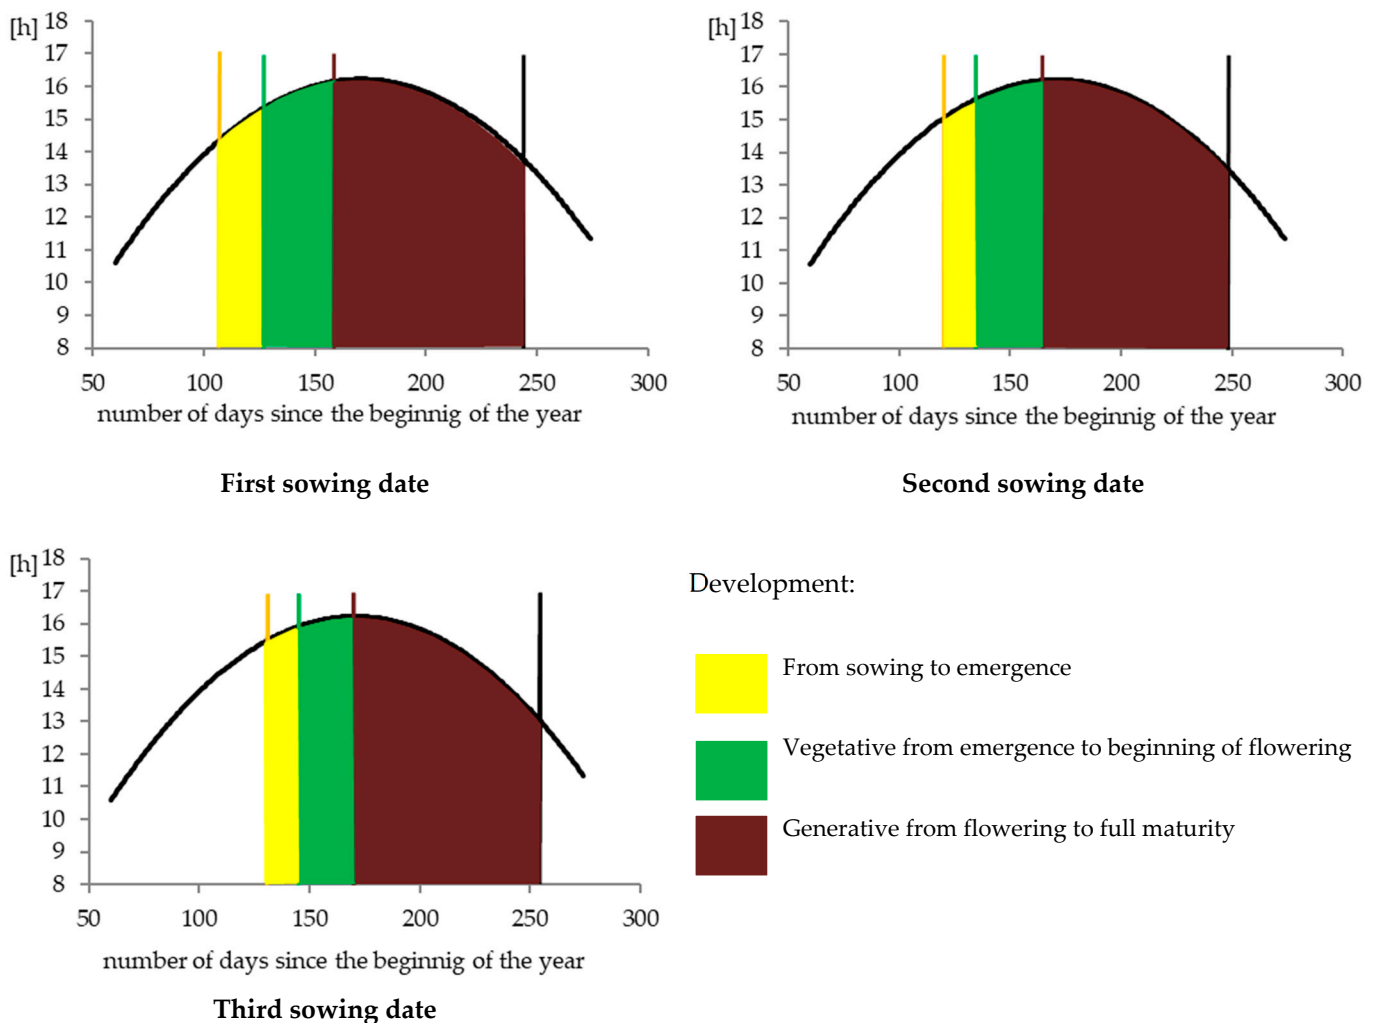

**Figure S6.** Influence of sowing date on the duration of growth stages in relation to changing day length on Wrocław latitude (51°10' N).

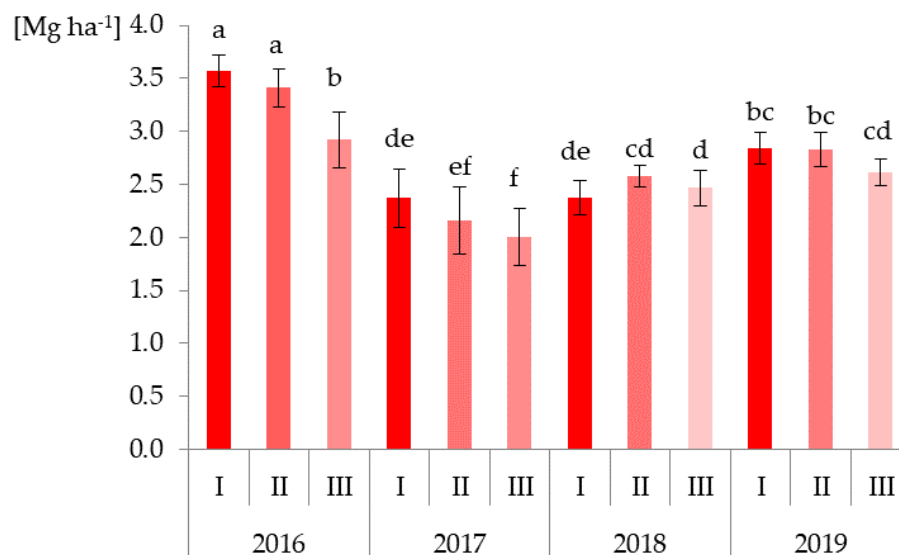

**Figure S7.** Effect of SxY interaction on soybean seed yields. 2016, 2017, 2018, 2019 – years of research; I, II, III - sowing dates: I – the earliest (16-21.04), II – delayed 10 days in relation to the earliest date (26.04-10.05), III – delayed 20 days in relation to the earliest (06-19.05). The vertical line atop each bar is SD for that mean. Different letters indicate a significant difference (Tukey's multiple range test).

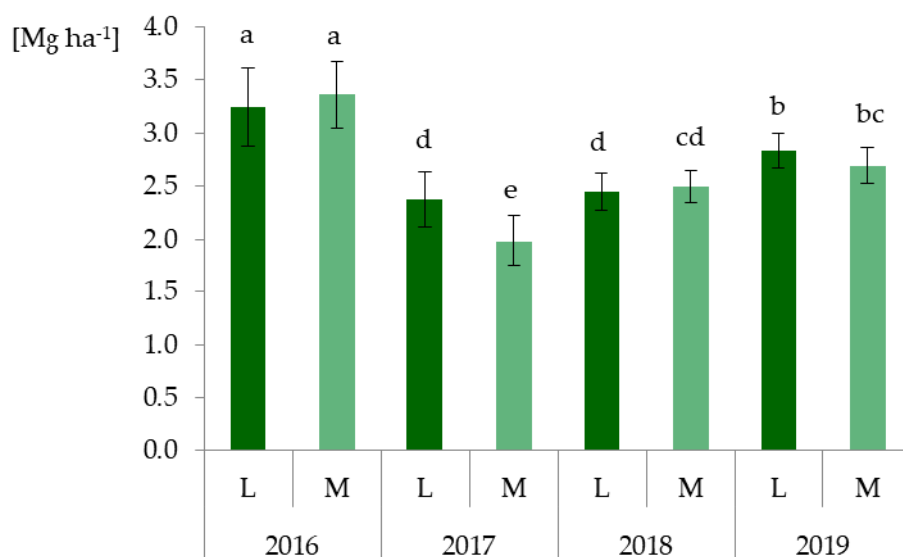

**Figure S8.** Effect of CxY interaction on soybean seed yields. 2016, 2017, 2018, 2019 – years of research; L – Lissabon cultivar, M – Merlin cultivar. The vertical line atop each bar is SD for that mean. Different letters indicate a significant difference (Tukey's multiple range test).
